# Supplementary material for: Drosophila parasitoid wasps bears a distinct DNA transposon profile
Source: PubMed Central journal article supplement (PMC6035795; doi:10.1186/s13100-018-0127-2), 2018-07-07
Supplement: 13100_2018_127_MOESM1_ESM.pdf [file 13100_2018_127_MOESM1_ESM.pdf]

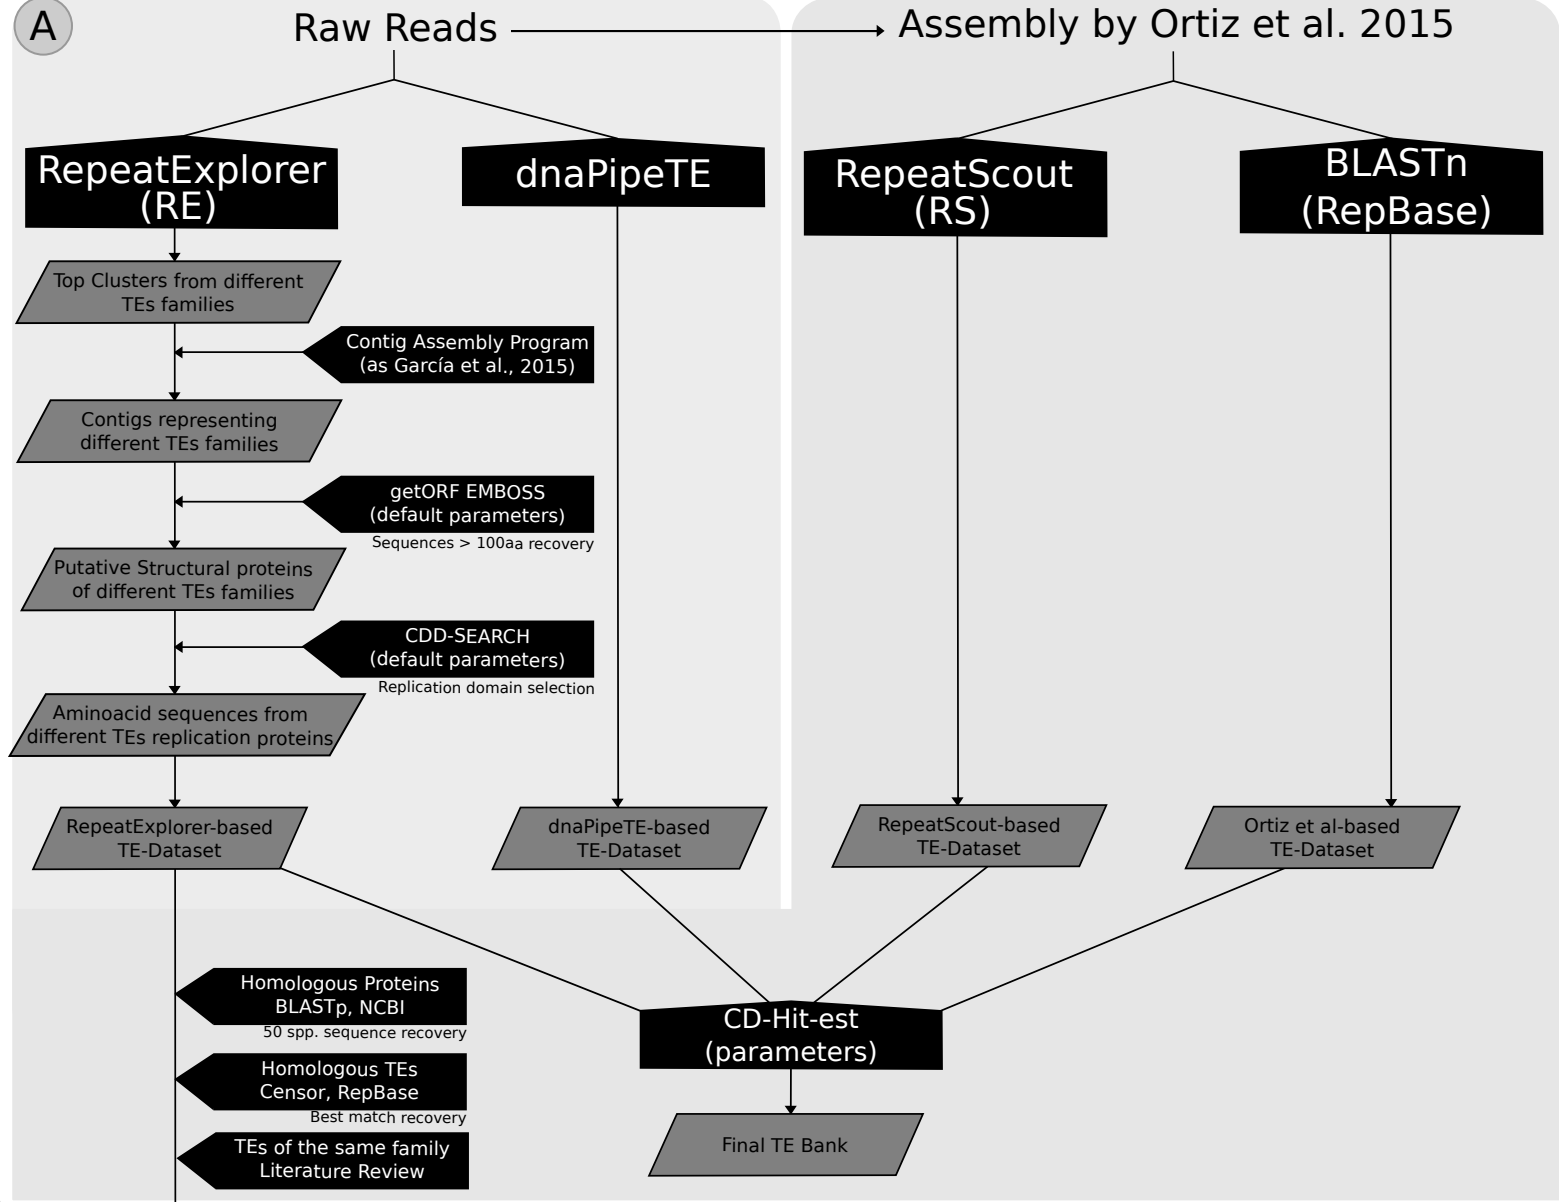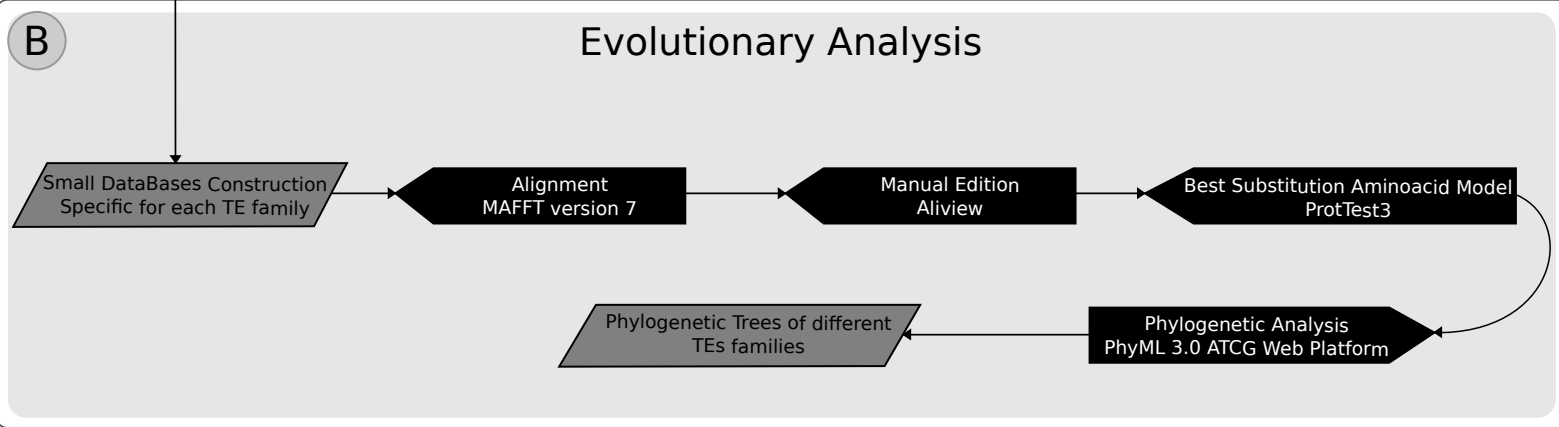

**Supplementary Material 1.1** - Pipeline built for this work. **A** - Different strategies for TEs identification. **B** - Evolutionary history reconstruction of different families. Web platforms was next: RepeatExplorer: <http://www.repeatexplorer.org/> - CDDSearch: <https://www.ncbi.nlm.nih.gov/Structure/cdd/wrpsb.cgi> - getORF: <http://emboss.bioinformatics.nl/cgi-bin/emboss/> - BLASTp: <https://blast.ncbi.nlm.nih.gov/Blast.cgi?PAGE=Proteins> - Censor, Repbase: <http://www.girinst.org/censor/> - MAFFT:<https://mafft.cbrc.jp/alignment/server/> - PhyML 3.0: <http://www.atgc-montpellier.fr/phyml/>
