# Supplementary material for: Drosophila parasitoid wasps bears a distinct DNA transposon profile
Source: Mob DNA. 2018 Jul 7;9:23. doi: 10.1186/s13100-018-0127-2 (PMC6035795; doi:10.1186/s13100-018-0127-2)

Branch Value: aLRT

Colored ranges

- 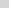 NCBI blastp nr
- 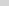 Outgroup
- 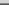 Literature Elements
- 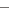 RepBase Elements
- 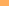 Wasps Elements

Others

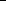 Fungi  
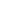 Viridiplantae

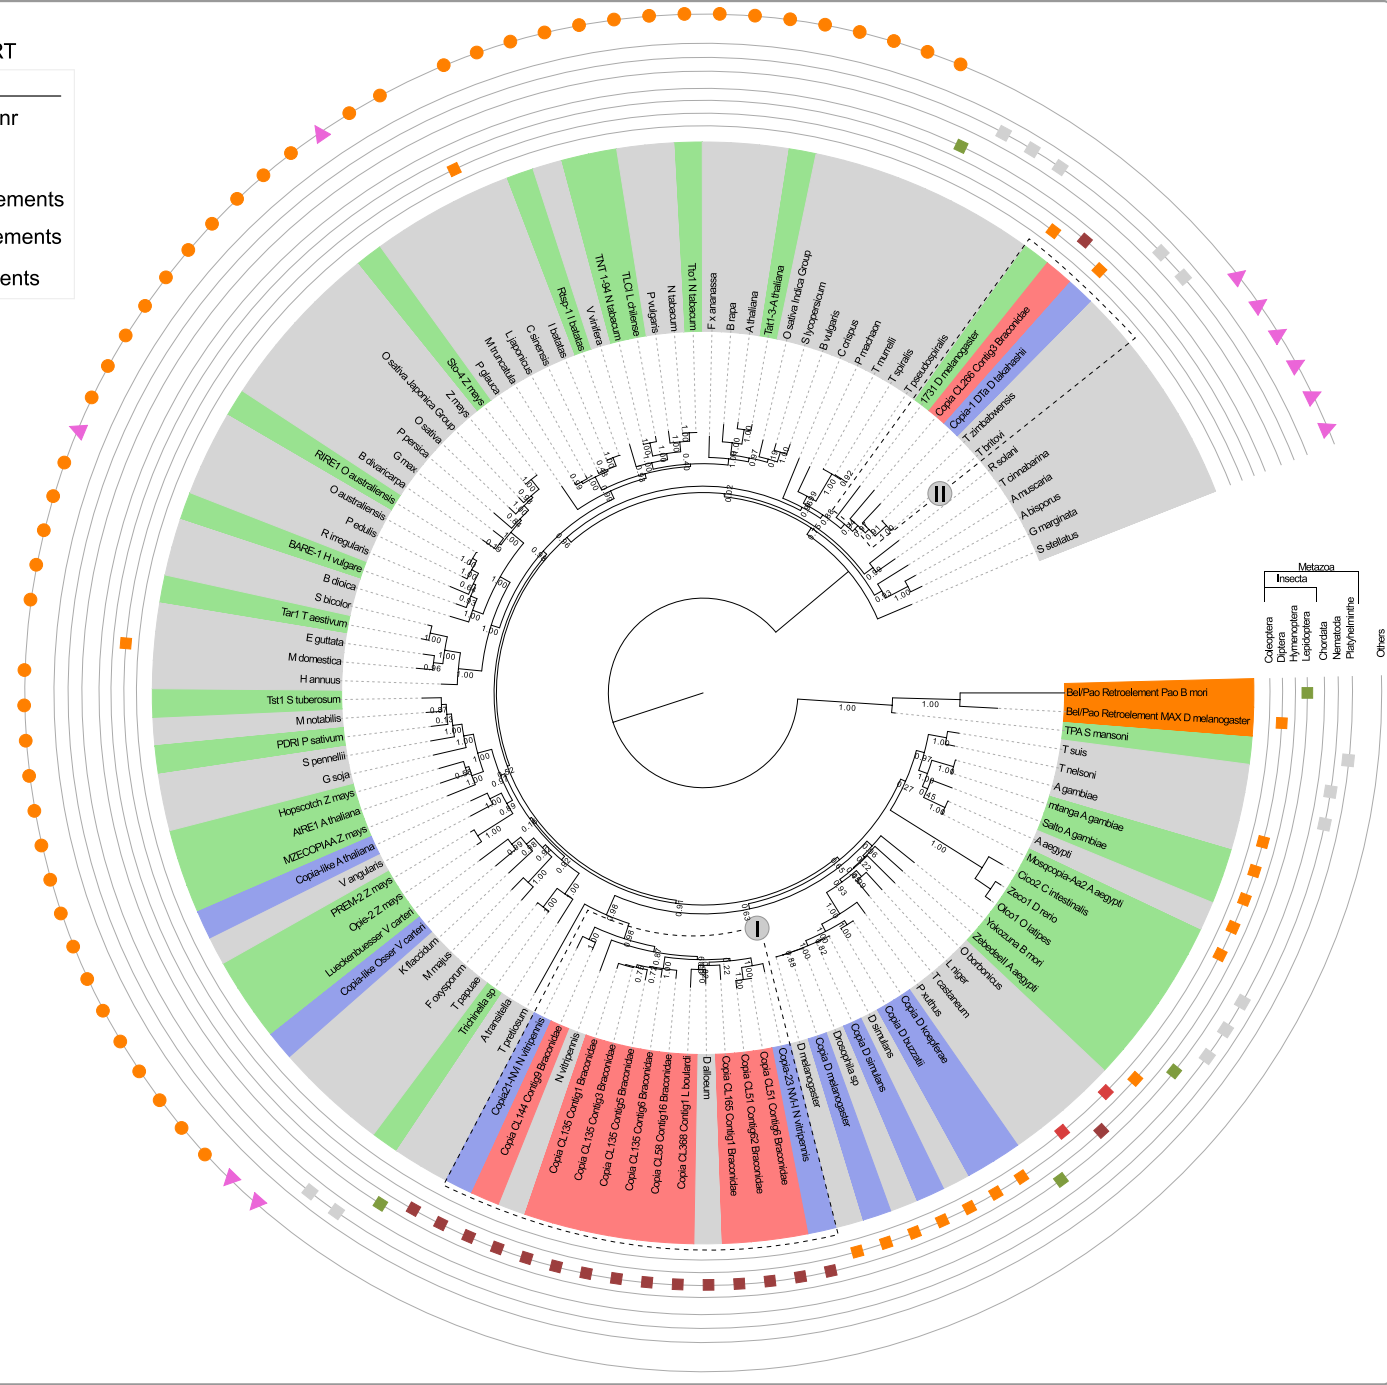

Supplement: Supplementary file 9 — Copia superfamily tree reconstructed by maximum likelihood. Numbers on branches denote the aLRT branch support. (PDF 641 kb) [file 13100_2018_127_MOESM9_ESM.pdf]
